# Supplementary material for: Assessing filtering of mountaintop CO 2 mole fractions for application to inverse models of biosphere-atmosphere carbon exchange
Source: Copernicus journal article supplement (doi:10.5194/acp-12-2099-2012), 2012-02-22
Supplement: Supplementary file 1 [file rr_filters_supp_mat.xls]

## Sheet: Carr CO2
This tab contains data showing the overlap between CO2 measurements from the RACCOON Niwot Ridge station and airborne CO2 measurements taken above Carr, Colorado between 2005 and 2009. Gaps in the Niwot time series represent times when no data was collected due to instrument failure. Measurements from Carr represent weekly atmospheric CO2 profiles from which we have selected and averaged measurem…
year	month	day	hour	Carr_CO2_mean	count (# of elements in mean)	Niwot_CO2
2005	9	2	10	375.12	3	373.473
2005	9	9	10	377.92	3	376.29
2005	9	16	7	373.81	3	374.54
2005	9	23	9	377.03	3	375.848
2005	9	30	7	376.58	3	377.014
2005	10	7	10	376.99	2	376.872
2005	10	14	10	378.233	3
2005	10	22	10	380.41	2	378.639
2005	10	28	14	377.73	3	377.956
2005	11	7	11	378.307	3	378.635
2005	11	13	11	381.777	3	380.182
2005	11	18	10	380.387	3	380.075
2005	11	23	11	379.36	3
2005	12	2	9	380.687	3	380.799
2005	12	16	9	384.69	2	382.558
2005	12	22	16	381.41	3	381.139
2005	12	30	12	383.48	3
2006	1	13	8	382.875	2
2006	1	28	11	385.273	3	385.133
2006	2	12	11	383.9	2	383.223
2006	2	12	12	385.35	1	383.234
2006	2	26	11	383.72	2	383.886
2006	3	14	11	387.23	3	384.991
2006	3	29	11	385.613	3	384.829
2006	4	14	10	386.393	3	384.86
2006	4	29	10	385.613	3	386.266
2006	5	11	11	386.123	3	386.227
2006	5	25	11	383.963	3	382.954
2006	6	8	9	386.613	3	384.029
2006	6	23	10	380.88	3	380.318
2006	7	6	11	386.153	3	382.064
2006	7	20	10	381.31	3
2006	8	3	10	379.96	1	376.681
2006	8	3	11	380.83	2	379.667
2006	8	17	10	381.59	3	379.831
2006	8	31	10	380.527	3
2006	9	14	10	379.73	3	377.469
2006	9	28	10	379.697	3	379.992
2006	10	15	10	380.213	3	379.909
2006	10	27	10	381.585	2	381.566
2006	11	9	11	382.937	3	382.138
2006	11	25	11	382.15	1	381.591
2006	11	25	12	382.48	2	381.778
2007	1	2	12	383.703	3
2007	1	18	10	386.74	2	386.302
2007	1	18	11	387.32	1	386.325
2007	1	26	11	384.01	1
2007	1	26	12	384.605	2
2007	2	10	12	387.127	3	385.706
2007	2	22	12	385.247	3	384.366
2007	3	9	11	387.583	3	387.359
2007	3	22	10	385.83	3	384.889
2007	4	10	9	387.812	4	387.671
2007	4	26	9	387.283	3	387.006
2007	5	11	10	385.767	3	385.999
2007	6	1	9	383.163	3	383.271
2007	6	15	10	382.94	3	383.828
2007	7	5	9	382.697	3	380.888
2007	7	23	9	383.697	3	381.303
2007	8	3	10	385.387	3	383.415
2007	8	17	10	383.89	3	382.829
2007	9	8	10	382.45	3	381.126
2007	9	14	9	382.82	3
2007	9	27	10	380.297	3
2007	10	15	10	383.38	3	383.817
2007	10	25	9	381.78	1	381.782
2007	10	25	10	381.87	2	381.74
2007	11	17	10	383.737	3	383.6
2007	12	5	12	386.51	3	385.616
2007	12	20	14	385.787	3
2008	1	14	10	387.64	3	387.24
2008	1	29	15	389.245	4	389.551
2008	2	7	10	388.487	3	388.882
2008	3	23	10	391.61	4
2008	4	8	8	390.623	3
2008	4	17	10	391.197	4
2008	4	28	9	391.31	1
2008	4	28	10	391.935	2
2008	5	11	9	389.453	3
2008	5	31	11	389.46	3
2008	6	10	9	386.367	3
2008	6	27	10	384.827	3
2008	7	3	10	385.945	2	383.909
2008	7	24	11	389.577	3	385.16
2008	8	9	10	388.64	3	383.474
2008	8	25	9	384.29	2	382.195
2008	8	25	10	383.52	1	382.46
2008	9	3	10	376.977	3	379.363
2008	9	23	9	382.765	2
2008	10	3	10	381.997	3	381.416
2008	10	17	9	384.073	3	383.221
2008	10	29	11	384.54	2	384.351
2008	10	29	12	386.17	1	384.536
2008	11	12	11	386.945	4	387.424
2008	11	19	11	385.93	1	386.025
2008	11	19	12	386.075	2	385.664
2008	12	10	10	386.833	3
2008	12	27	11	390.9	1
2009	1	6	11	389.113	3
2009	1	20	11	386.613	3	386.749
2009	2	4	11	388	2	387.699
2009	2	19	9	391.54	1	391.056
2009	3	8	10	391.31	4	390.709
2009	3	21	10	390.597	3	389.024
2009	4	10	12	392.81	2	391.342
2009	4	23	10	390.317	3	390.241
2009	5	7	10	390.62	1
2009	5	7	11	390.665	2
2009	5	27	14	386.11	3	385.579
2009	6	13	10	388.157	3	388.923
2009	6	25	10	387.68	3	386.062
2009	7	12	9	389.163	3	387.796
2009	7	26	10	385.497	3	381.396
2009	8	4	9	388.04	3

## Sheet: Filter demonstration
This tab uses data from Storm Peak Lab (SPL) to demonstrate how our filtering was done. SV, SVLG, and SVLR are implemented here exactly as was done for the main paper. However, please note that because WM and SI filters use sliding windows of previous and following days the WM and SI filters given here represent abbreviated versions of the full filter protocol that only use the several days surro…
									SPL inlet heights		CT-2009 min,max day CO2		CT-2009 min,max night CO2
									(meters above ground)		lapse rate limits above SPL		lapse rate limits above SPL
									9.1		-0.326282	(min)	-0.244204
									5.8		0.928908	(max)	2.34578
									Filtered subsets
fractional year	year	month	day	hour	co2_2 (2nd inlet)	co2_3 (highest inlet)	co2_3_sd (standard deviation)		SV	SVLG	SVLR	WM (scroll down)	SI (scroll down)
2009.26	2009	4	6	17	392.122	391.987	0.661		391.987	391.987	391.987
2009.26	2009	4	6	18	391.749	391.529	0.684		391.529	391.529	391.529
2009.26	2009	4	6	19	391.115	390.748	0.642		390.748	390.748	390.748
2009.26	2009	4	6	20	391.474	391.335	1.18		REJECT	REJECT	REJECT
2009.26	2009	4	6	21	393.116	392.822	0.225		392.822	392.822	392.822
2009.26	2009	4	6	22	393.1	392.887	0.265		392.887	392.887	392.887
2009.26	2009	4	6	23	392.499	392.246	0.203		392.246	392.246	392.246
2009.26	2009	4	7	0	391.967	391.74	0.209		391.74	391.74	391.74
2009.26	2009	4	7	1	391.59	391.464	0.096		391.464	391.464	391.464
2009.26	2009	4	7	2	391.444	391.358	0.092		391.358	391.358	391.358
2009.26	2009	4	7	3	391.465	391.229	0.071		391.229	391.229	391.229
2009.26	2009	4	7	4	391.576	391.319	0.13		391.319	391.319	391.319
2009.26	2009	4	7	5	391.84	391.723	0.215		391.723	391.723	391.723
2009.26	2009	4	7	6	392.203	392.102	0.197		392.102	392.102	392.102
2009.26	2009	4	7	7	391.974	391.792	0.58		391.792	391.792	391.792
2009.26	2009	4	7	8	390.722	390.595	0.17		390.595	390.595	390.595
2009.26	2009	4	7	9	390.722	390.644	0.106		390.644	390.644	390.644
2009.27	2009	4	7	10	391.363	390.984	0.376		390.984	390.984	390.984
2009.27	2009	4	7	11	391.904	391.78	0.54		391.78	391.78	391.78
2009.27	2009	4	7	12	392.094	391.823	0.239		391.823	391.823	391.823
2009.27	2009	4	7	13	392.432	392.113	0.351		392.113	392.113	392.113
2009.27	2009	4	7	14	392.312	392.18	0.272		392.18	392.18	392.18
2009.27	2009	4	7	15	392.458	392.201	0.183		392.201	392.201	392.201
2009.27	2009	4	7	16	392.309	392.154	0.311		392.154	392.154	392.154
2009.27	2009	4	7	17	392.727	392.498	0.136		392.498	392.498	392.498
2009.27	2009	4	7	18	392.392	392.151	0.281		392.151	392.151	392.151
2009.27	2009	4	7	19	391.828	391.674	0.149		391.674	391.674	391.674
2009.27	2009	4	7	20	391.688	391.512	0.111		391.512	391.512	391.512
2009.27	2009	4	7	21	391.768	391.517	0.112		391.517	391.517	391.517
2009.27	2009	4	7	22	391.436	391.273	0.169		391.273	391.273	391.273
2009.27	2009	4	7	23	390.88	390.752	0.202		390.752	390.752	390.752
2009.27	2009	4	8	0	390.671	390.49	0.099		390.49	390.49	390.49
2009.27	2009	4	8	1	390.576	390.457	0.062		390.457	390.457	390.457
2009.27	2009	4	8	2	390.908	390.821	0.192		390.821	390.821	390.821
2009.27	2009	4	8	3	391.15	391.042	0.074		391.042	391.042	391.042
2009.27	2009	4	8	4	391.165	391.108	0.107		391.108	391.108	391.108
2009.27	2009	4	8	5	391.424	391.229	0.065		391.229	391.229	391.229
2009.27	2009	4	8	6	391.437	391.35	0.153		391.35	391.35	391.35
2009.27	2009	4	8	7	391.541	391.482	0.108		391.482	391.482	391.482
2009.27	2009	4	8	8	392.02	391.971	0.206		391.971	391.971	391.971
2009.27	2009	4	8	9	392.1	391.963	0.124		391.963	391.963	391.963
2009.27	2009	4	8	10	391.777	391.611	0.155		391.611	391.611	391.611
2009.27	2009	4	8	11	391.499	391.332	0.12		391.332	391.332	391.332
2009.27	2009	4	8	12	391.38	391.184	0.106		391.184	391.184	391.184
2009.27	2009	4	8	13	391.195	391.017	0.153		391.017	391.017	391.017
2009.27	2009	4	8	14	390.825	390.638	0.124		390.638	390.638	390.638
2009.27	2009	4	8	15	390.844	390.819	0.147		390.819	390.819	390.819
2009.27	2009	4	8	16	390.955	390.845	0.245		390.845	390.845	390.845
2009.27	2009	4	8	17	390.547	390.347	0.079		390.347	390.347	390.347
2009.27	2009	4	8	18	391.196	391.019	0.405		391.019	391.019	391.019
2009.27	2009	4	8	19	391.339	391.129	0.102		391.129	391.129	391.129
2009.27	2009	4	8	20	391.335	391.214	0.11		391.214	391.214	391.214
2009.27	2009	4	8	21	391.285	391.199	0.191		391.199	391.199	391.199
2009.27	2009	4	8	22	391.417	391.435	0.218		391.435	391.435	391.435
2009.27	2009	4	8	23	391.42	391.239	0.043		391.239	391.239	391.239
2009.27	2009	4	9	0	391.629	391.49	0.096		391.49	391.49	391.49
2009.27	2009	4	9	1	391.573	391.519	0.183		391.519	391.519	391.519
2009.27	2009	4	9	2	391.779	391.609	0.119		391.609	391.609	391.609
2009.27	2009	4	9	3	392.841	392.811	1.486		0	0	0
2009.27	2009	4	9	4	394.467	394.16	0.836		394.16	394.16	394.16
2009.27	2009	4	9	5	394.097	394.127	0.472		394.127	394.127	394.127
2009.27	2009	4	9	6	392.967	392.88	0.584		392.88	392.88	392.88
2009.27	2009	4	9	7	392.781	392.709	0.174		392.709	392.709	392.709
2009.27	2009	4	9	8	393.078	393.121	0.27		393.121	393.121	393.121
2009.27	2009	4	9	9	393.146	392.971	0.183		392.971	392.971	392.971
2009.27	2009	4	9	10	392.63	392.612	0.138		392.612	392.612	392.612
2009.27	2009	4	9	11	392.501	392.359	0.094		392.359	392.359	392.359
2009.27	2009	4	9	12	392.709	392.542	0.329		392.542	392.542	392.542
2009.27	2009	4	9	13	392.062	391.866	0.137		391.866	391.866	391.866
2009.27	2009	4	9	14	392.485	392.263	0.113		392.263	392.263	392.263
2009.27	2009	4	9	15	392.43	392.262	0.058		392.262	392.262	392.262
2009.27	2009	4	9	16	392.355	392.292	0.219		392.292	392.292	392.292				Iteration 1			Iteration 2...
2009.27	2009	4	9	17	392.947	392.852	0.563		392.852	392.852	392.852						Reject 1 measurement per day if largest residual for that day and greater than 0.5 ppm			Reject 1 measurement per day if largest residual for that day and greater than 0.5 ppm
2009.27	2009	4	9	18	392.883	392.709	0.092		392.709	392.709	392.709
2009.27	2009	4	9	19	392.794	392.685	0.134		392.685	392.685	392.685	Filtering begins here for WM and SI filters because they require several prior days of data to filter for the current day
2009.27	2009	4	9	20	392.535	392.247	0.233		392.247	392.247	392.247
2009.27	2009	4	9	21	392.291	392.198	0.146		392.198	392.198	392.198				interpolation	residual		interpolation	residual
2009.27	2009	4	9	22	392.466	392.291	0.152		392.291	392.291	392.291
2009.27	2009	4	9	23	392.807	392.647	0.321		392.647	392.647	392.647					SI reject iteration 1			SI reject iteration 1
2009.27	2009	4	10	0	392.522	392.361	0.392		392.361	392.361	392.361	392.361	392.361		392.15	0.21102	392.15
2009.27	2009	4	10	1	392.27	392.117	0.118		392.117	392.117	392.117	392.117	392.117		392.152	0.0348619	392.152
2009.27	2009	4	10	2	391.857	391.735	0.112		391.735	391.735	391.735	391.735	391.735		392.17	0.435287	392.17
2009.27	2009	4	10	3	392.049	391.934	0.079		391.934	391.934	391.934	391.934	391.934		392.173	0.23911	392.173
2009.27	2009	4	10	4	391.848	391.779	0.151		391.779	391.779	391.779	391.779	391.779		392.184	0.404589	392.184
2009.27	2009	4	10	5	391.796	391.634	0.089		391.634	391.634	391.634	391.634	391.634		392.21	0.575507	392.21
2009.27	2009	4	10	6	391.454	391.281	0.115		391.281	391.281	391.281	391.281	391.281		392.269	0.988104	392.269
2009.27	2009	4	10	7	391.736	391.708	0.14		391.708	391.708	391.708	391.708	391.708		392.3	0.591689	392.3
2009.27	2009	4	10	8	391.637	391.577	0.114		391.577	391.577	391.577	391.577	391.577		392.313	0.736478	392.313
2009.27	2009	4	10	9	391.71	391.713	0.179		391.713	391.713	391.713	391.713	391.713		392.331	0.618411	392.331
2009.27	2009	4	10	10	392.239	392.087	0.382		392.087	392.087	392.087	392.087	392.087		392.366	0.278813	392.366
2009.27	2009	4	10	11	391.994	391.81	0.381		391.81	391.81	391.81	391.81	391.81		392.405	0.595061	392.405
2009.27	2009	4	10	12	391.831	391.911	0.3		391.911	391.911	391.911	391.911	391.911		392.448	0.537093	392.448
2009.27	2009	4	10	13	392.2	391.933	0.126		391.933	391.933	391.933	391.933	391.933		392.482	0.5491	392.482
2009.27	2009	4	10	14	392.306	392.003	0.19		392.003	392.003	392.003	392.003	392.003		392.511	0.508163	392.511
2009.27	2009	4	10	15	392.305	392.111	0.227		392.111	392.111	392.111	392.111	392.111		392.541	0.429834	392.541
2009.27	2009	4	10	16	392.389	392.135	0.187		392.135	392.135	392.135	0	392.135		392.556	0.42109	392.556
2009.27	2009	4	10	17	392.467	396.009	9.982		0	0	0	396.009	0		392.566	3.4435	REJECT
2009.27	2009	4	10	18	392.449	392.332	0.249		392.332	392.332	392.332	392.332	392.332		392.581	0.248746	392.581
2009.27	2009	4	10	19	392.915	392.791	0.558		392.791	392.791	392.791	392.791	392.791		392.589	0.202215	392.589
2009.27	2009	4	10	20	393.173	392.738	0.466		392.738	392.738	392.738	392.738	392.738		392.596	0.141544	392.596
2009.27	2009	4	10	21	392.558	392.385	0.066		392.385	392.385	392.385	392.385	392.385		392.599	0.214149	392.599
2009.27	2009	4	10	22	392.758	392.58	0.202		392.58	392.58	392.58	392.58	392.58		392.602	0.0222612	392.602
2009.27	2009	4	10	23	392.937	392.724	0.069		392.724	392.724	392.724	392.724	392.724		392.613	0.110895	392.613
2009.27	2009	4	11	0	392.957	392.816	0.123		392.816	392.816	392.816	392.816	392.816		392.632	0.183874	392.632
2009.27	2009	4	11	1	393.123	392.865	0.128		392.865	392.865	392.865	392.865	392.865		392.646	0.219191	392.646
2009.28	2009	4	11	2	393.356	393.039	0.164		393.039	393.039	393.039	393.039	393.039		392.667	0.371857	392.667
2009.28	2009	4	11	3	392.592	392.41	0.21		392.41	392.41	392.41	392.41	392.41		392.687	0.276584	392.687
2009.28	2009	4	11	4	392.77	392.597	0.097		392.597	392.597	392.597	392.597	392.597		392.698	0.101119	392.698
2009.28	2009	4	11	5	392.769	392.51	0.167		392.51	392.51	392.51	392.51	392.51		392.686	0.175618	392.686
2009.28	2009	4	11	6	392.585	392.438	0.171		392.438	392.438	392.438	392.438	392.438		392.676	0.237773	392.676
2009.28	2009	4	11	7	392.84	392.709	0.188		392.709	392.709	392.709	392.709	392.709		392.672	0.0368997	392.672
2009.28	2009	4	11	8	392.992	392.765	0.106		392.765	392.765	392.765	392.765	392.765		392.674	0.090516	392.674
2009.28	2009	4	11	9	392.81	392.641	0.096		392.641	392.641	392.641	392.641	392.641		392.696	0.0553104	392.696
2009.28	2009	4	11	10	392.984	392.64	0.236		392.64	392.64	392.64	392.64	392.64		392.7	0.059759	392.7
2009.28	2009	4	11	11	396.002	395.974	2.902		0	0	0	395.974	0		392.693	3.28074	REJECT
2009.28	2009	4	11	12	395.057	395.166	0.972		395.166	395.166	395.166	395.166	395.166		392.687	2.47941	392.687
2009.28	2009	4	11	13	393.593	393.15	1.365		0	0	0	0	393.15		392.677	0.473049	392.677
2009.28	2009	4	11	14	392.317	392.069	0.257		392.069	392.069	392.069	392.069	392.069		392.674	0.604762	392.674
2009.28	2009	4	11	15	391.968	391.784	0.161		391.784	391.784	391.784	391.784	391.784		392.665	0.881097	392.665
2009.28	2009	4	11	16	392.381	392.257	0.489		392.257	392.257	392.257	392.257	392.257		392.656	0.398898	392.656
2009.28	2009	4	11	17	392.951	392.786	0.421		392.786	392.786	392.786	392.786	392.786		392.647	0.138614	392.647
2009.28	2009	4	11	18	393.727	393.459	0.678		393.459	393.459	393.459	393.459	393.459		392.632	0.826713	392.632
2009.28	2009	4	11	19	391.401	391.297	0.375		391.297	391.297	391.297	391.297	391.297		392.617	1.32007	392.617
2009.28	2009	4	11	20	391.023	391.072	0.524		391.072	391.072	391.072	391.072	391.072		392.599	1.52734	392.599
2009.28	2009	4	11	21	393.814	393.694	1.406		0	0	0	393.694	393.694		392.587	1.1071	392.587
2009.28	2009	4	11	22	391.699	391.592	1.49		0	0	0	391.592	391.592		392.578	0.985609	392.578
2009.28	2009	4	11	23	390.688	390.427	0.073		390.427	390.427	390.427	390.427	390.427		392.568	2.14074	392.568
2009.28	2009	4	12	0	390.789	390.764	0.398		390.764	390.764	390.764	390.764	390.764		392.552	1.78777	392.552
2009.28	2009	4	12	1	392.378	392.271	0.53		392.271	392.271	392.271	392.271	392.271		392.539	0.267803	392.539
2009.28	2009	4	12	2	391.235	391.165	0.213		391.165	391.165	391.165	391.165	391.165		392.526	1.36087	392.526
2009.28	2009	4	12	3	392.206	392.084	0.706		392.084	392.084	392.084	392.084	392.084		392.518	0.433744	392.518
2009.28	2009	4	12	4	393.91	393.588	0.572		393.588	393.588	393.588	0	393.588		392.509	1.07871	392.509
2009.28	2009	4	12	5	396.708	396.863	1.244		0	0	0	396.863	0		392.504	4.35855	REJECT
2009.28	2009	4	12	6	394.709	394.258	0.908		394.258	394.258	394.258	0	394.258		392.508	1.75004	392.508
2009.28	2009	4	12	7	393.191	392.814	0.18		392.814	392.814	392.814	0	392.814		392.518	0.295934	392.518
2009.28	2009	4	12	8	393.488	393.664	0.967		393.664	393.664	393.664	393.664	393.664		392.521	1.14289	392.521
2009.28	2009	4	12	9	395.392	395.198	0.212		395.198	395.198	395.198	0	395.198		392.521	2.6772	392.521
2009.28	2009	4	12	10	395.612	395.322	0.546		395.322	395.322	395.322	0	395.322		392.513	2.80935	392.513
2009.28	2009	4	12	11	395.621	395.413	0.392		395.413	395.413	395.413	0	395.413		392.498	2.91504	392.498
2009.28	2009	4	12	12	394.519	394.429	0.34		394.429	394.429	394.429	394.429	394.429		392.488	1.94133	392.488
2009.28	2009	4	12	13	394.041	393.812	0.32		393.812	393.812	393.812	0	393.812		392.477	1.33534	392.477
2009.28	2009	4	12	14	393.622	393.51	0.223		393.51	393.51	393.51	393.51	393.51		392.475	1.03515	392.475
2009.28	2009	4	12	15	392.544	392.341	0.596		392.341	392.341	392.341	392.341	392.341		392.461	0.120243	392.461
2009.28	2009	4	12	16	391.988	391.821	0.111		391.821	391.821	391.821	391.821	391.821		392.444	0.622616	392.444
2009.28	2009	4	12	17	391.998	391.896	0.098		391.896	391.896	391.896	391.896	391.896		392.425	0.529347	392.425
2009.28	2009	4	12	18	392.049	391.859	0.087		391.859	391.859	391.859	391.859	391.859		392.366	0.506903	392.366
2009.28	2009	4	12	19	392.018	391.93	0.209		391.93	391.93	391.93	391.93	391.93		392.345	0.414976	392.345
2009.28	2009	4	12	20	391.683	391.547	0.12		391.547	391.547	391.547	391.547	391.547		392.323	0.776213	392.323
2009.28	2009	4	12	21	391.761	391.572	0.126		391.572	391.572	391.572	0	391.572		392.306	0.733893	392.306
2009.28	2009	4	12	22	392.606	392.514	0.981		392.514	392.514	392.514	392.514	392.514		392.295	0.218524	392.295
2009.28	2009	4	12	23	393.535	393.091	0.518		393.091	393.091	393.091	0	393.091		392.283	0.808126	392.283
2009.28	2009	4	13	0	392.818	392.832	0.25		392.832	392.832	392.832	392.832	392.832		392.27	0.561973	392.27
2009.28	2009	4	13	1	393.883	393.573	1.088		0	0	0	0	393.573		392.253	1.31982	392.253
2009.28	2009	4	13	2	393.58	393.483	0.41		393.483	393.483	393.483	393.483	393.483		392.237	1.24642	392.237
2009.28	2009	4	13	3	393.964	393.879	0.241		393.879	393.879	393.879	393.879	393.879		392.218	1.66099	392.218
2009.28	2009	4	13	4	392.969	392.905	0.356		392.905	392.905	392.905	392.905	392.905		392.208	0.697226	392.208
2009.28	2009	4	13	5	393.164	393.12	0.192		393.12	393.12	393.12	393.12	393.12		392.199	0.921313	392.199
2009.28	2009	4	13	6	392.771	392.525	0.217		392.525	392.525	392.525	392.525	392.525		392.186	0.33925	392.186
2009.28	2009	4	13	7	393.185	392.929	1.259		0	0	0	0	392.929		392.174	0.755488	392.174
2009.28	2009	4	13	8	395.205	395.133	0.832		395.133	395.133	395.133	395.133	0		392.159	2.97415	REJECT
2009.28	2009	4	13	9	393.436	393.276	0.535		393.276	393.276	393.276	393.276	393.276		392.143	1.1325	392.143
2009.28	2009	4	13	10	392.149	392.012	0.216		392.012	392.012	392.012	392.012	392.012		392.131	0.118564	392.131
2009.28	2009	4	13	11	391.836	391.759	0.186		391.759	391.759	391.759	391.759	391.759		392.114	0.355394	392.114
2009.28	2009	4	13	12	391.675	391.654	0.188		391.654	391.654	391.654	391.654	391.654		392.064	0.410491	392.064
2009.28	2009	4	13	13	391.858	391.619	0.121		391.619	391.619	391.619	0	391.619		392.024	0.405437	392.024
2009.28	2009	4	13	14	391.692	391.482	0.093		391.482	391.482	391.482	0	391.482		392.005	0.522668	392.005
2009.28	2009	4	13	15	391.581	391.431	0.156		391.431	391.431	391.431	391.431	391.431		391.994	0.563189	391.994
2009.28	2009	4	13	16	391.629	391.523	0.08		391.523	391.523	391.523	391.523	391.523		391.985	0.462195	391.985
2009.28	2009	4	13	17	391.595	391.435	0.08		391.435	391.435	391.435	391.435	391.435		391.972	0.53738	391.972
2009.28	2009	4	13	18	391.601	391.29	0.192		391.29	391.29	391.29	391.29	391.29		391.957	0.666949	391.957
2009.28	2009	4	13	19	391.133	391.032	0.105		391.032	391.032	391.032	391.032	391.032		391.934	0.90235	391.934
2009.28	2009	4	13	20	391.309	391.113	0.125		391.113	391.113	391.113	0	391.113		391.937	0.824155	391.937
2009.28	2009	4	13	21	391.453	391.358	0.13		391.358	391.358	391.358	391.358	391.358		391.945	0.586893	391.945
2009.28	2009	4	13	22	391.651	391.391	0.076		391.391	391.391	391.391	0	391.391		391.926	0.534671	391.926
2009.28	2009	4	13	23	391.308	391.158	0.138		391.158	391.158	391.158	391.158	391.158		391.94	0.781503	391.94
2009.28	2009	4	14	0	391.366	391.167	0.139		391.167	391.167	391.167	391.167	391.167		391.964	0.796567	391.964
2009.28	2009	4	14	1	391.092	390.941	0.12		390.941	390.941	390.941	390.941	390.941		391.984	1.04308	391.984
2009.28	2009	4	14	2	391.117	391.029	0.066		391.029	391.029	391.029	391.029	391.029		391.998	0.96922	391.998
2009.28	2009	4	14	3	391.284	391.184	0.13		391.184	391.184	391.184	391.184	391.184		392.014	0.830299	392.014
2009.28	2009	4	14	4	391.499	391.374	0.107		391.374	391.374	391.374	391.374	391.374		392.023	0.649454	392.023
2009.28	2009	4	14	5	392.125	392.013	0.284		392.013	392.013	392.013	392.013	392.013		392.021	0.00751411	392.021
2009.28	2009	4	14	6	392.453	392.295	0.212		392.295	392.295	392.295	392.295	392.295		391.98	0.314526	391.98
2009.28	2009	4	14	7	392.245	392.04	0.156		392.04	392.04	392.04	392.04	392.04		391.962	0.0779174	391.962
2009.28	2009	4	14	8	391.764	391.606	0.507		391.606	391.606	391.606	391.606	391.606		391.957	0.350771	391.957
2009.28	2009	4	14	9	391.063	391.005	0.637		391.005	391.005	391.005	391.005	391.005		391.943	0.938465	391.943
2009.28	2009	4	14	10	390.988	390.749	0.073		390.749	390.749	390.749	390.749	390.749		391.917	1.16795	391.917
2009.28	2009	4	14	11	391.072	390.898	0.164		390.898	390.898	390.898	390.898	390.898		391.887	0.989259	391.887
2009.28	2009	4	14	12	390.999	390.923	0.078		390.923	390.923	390.923	390.923	390.923		391.866	0.942574	391.866
2009.28	2009	4	14	13	391.109	391.798	2.219		0	0	0	391.798	391.798		391.858	0.0604224	391.858
2009.28	2009	4	14	14	390.9	390.768	0.144		390.768	390.768	390.768	390.768	390.768		391.871	1.10338	391.871
2009.28	2009	4	14	15	390.682	390.497	0.06		390.497	390.497	390.497	390.497	390.497		391.867	1.37033	391.867
2009.28	2009	4	14	16	390.714	390.457	0.132		390.457	390.457	390.457	390.457	390.457		391.873	1.41602	391.873
2009.28	2009	4	14	17	390.388	390.248	0.069		390.248	390.248	390.248	390.248	0		391.887	1.63919	REJECT
2009.29	2009	4	14	18	390.626	390.39	0.161		390.39	390.39	390.39	390.39	390.39		391.903	1.51323	391.903
2009.29	2009	4	14	19	390.97	390.742	0.25		390.742	390.742	390.742	390.742	390.742		391.928	1.18554	391.928
2009.29	2009	4	14	20	391.289	391.103	0.165		391.103	391.103	391.103	391.103	391.103		391.954	0.850513	391.954
2009.29	2009	4	14	21	391.531	391.411	0.074		391.411	391.411	391.411	391.411	391.411		391.979	0.56767	391.979
2009.29	2009	4	14	22	391.551	391.392	0.101		391.392	391.392	391.392	391.392	391.392		392.042	0.650427	392.042
2009.29	2009	4	14	23	391.691	391.501	0.244		391.501	391.501	391.501	391.501	391.501		392.111	0.610315	392.111
2009.29	2009	4	15	0	391.444	391.217	0.06		391.217	391.217	391.217	391.217	391.217		392.174	0.9567	392.174
2009.29	2009	4	15	1	391.422	391.282	0.127		391.282	391.282	391.282	391.282	391.282		392.24	0.958226	392.24
2009.29	2009	4	15	2	391.401	391.264	0.182		391.264	391.264	391.264	391.264	391.264		392.295	1.03137	392.295
2009.29	2009	4	15	3	391.52	391.445	0.148		391.445	391.445	391.445	391.445	391.445		392.347	0.902367	392.347
2009.29	2009	4	15	4	391.848	391.729	0.11		391.729	391.729	391.729	391.729	391.729		392.393	0.664017	392.393
2009.29	2009	4	15	5	391.447	391.289	0.177		391.289	391.289	391.289	391.289	391.289		392.439	1.15045	392.439
2009.29	2009	4	15	6	391.503	391.284	0.129		391.284	391.284	391.284	391.284	391.284		392.487	1.20293	392.487
2009.29	2009	4	15	7	391.508	391.313	0.101		391.313	391.313	391.313	391.313	391.313		392.541	1.22807	392.541
2009.29	2009	4	15	8	391.578	391.299	0.089		391.299	391.299	391.299	391.299	391.299		392.591	1.29157	392.591
2009.29	2009	4	15	9	391.499	391.409	0.099		391.409	391.409	391.409	391.409	391.409		392.617	1.20814	392.617
2009.29	2009	4	15	10	391.353	391.104	0.077		391.104	391.104	391.104	391.104	391.104		392.66	1.55639	392.66
2009.29	2009	4	15	11	391.248	391.078	0.145		391.078	391.078	391.078	391.078	391.078		392.712	1.63397	392.712
2009.29	2009	4	15	12	391.336	391.237	0.111		391.237	391.237	391.237	391.237	391.237		392.763	1.52627	392.763
2009.29	2009	4	15	13	391.36	391.242	0.144		391.242	391.242	391.242	391.242	391.242		392.817	1.57539	392.817
2009.29	2009	4	15	14	391.315	391.09	0.092		391.09	391.09	391.09	391.09	391.09		392.873	1.78288	392.873
2009.29	2009	4	15	15	391.057	390.962	0.085		390.962	390.962	390.962	390.962	0		392.927	1.96523	REJECT
2009.29	2009	4	15	16	391.097	391.05	0.124		391.05	391.05	391.05	391.05	391.05		392.977	1.92749	392.977
2009.29	2009	4	15	17	391.451	391.299	0.1		391.299	391.299	391.299	391.299	391.299		393.029	1.73001	393.029
2009.29	2009	4	15	18	391.571	391.263	0.106		391.263	391.263	391.263	391.263	391.263		393.083	1.82	393.083
2009.29	2009	4	15	19	391.764	391.596	0.248		391.596	391.596	391.596	391.596	391.596		393.134	1.5384	393.134
2009.29	2009	4	15	20	392.126	391.846	0.179		391.846	391.846	391.846	391.846	391.846		393.189	1.34274	393.189
2009.29	2009	4	15	21	391.929	391.794	0.123		391.794	391.794	391.794	391.794	391.794		393.243	1.44859	393.243
2009.29	2009	4	15	22	393.041	392.903	0.953		392.903	392.903	392.903	392.903	392.903		393.301	0.39821	393.301
2009.29	2009	4	15	23	392.976	392.757	0.063		392.757	392.757	392.757	392.757	392.757		393.36	0.602876	393.36
2009.29	2009	4	16	0	392.825	392.748	0.272		392.748	392.748	392.748	392.748	392.748		393.425	0.676989	393.425
2009.29	2009	4	16	1	393.623	393.575	0.408		393.575	393.575	393.575	393.575	393.575		393.489	0.0857687	393.489
2009.29	2009	4	16	2	392.89	392.712	0.122		392.712	392.712	392.712	392.712	392.712		393.548	0.83623	393.548
2009.29	2009	4	16	3	393.108	392.935	0.331		392.935	392.935	392.935	0	392.935		393.599	0.664113	393.599
2009.29	2009	4	16	4	393.348	393.218	0.274		393.218	393.218	393.218	0	393.218		393.645	0.426842	393.645
2009.29	2009	4	16	5	393.002	392.815	0.524		392.815	392.815	392.815	0	392.815		393.695	0.879785	393.695
2009.29	2009	4	16	6	392.6	392.401	0.13		392.401	392.401	392.401	0	392.401		393.751	1.34974	393.751
2009.29	2009	4	16	7	392.459	392.268	0.256		392.268	392.268	392.268	0	392.268		393.802	1.53418	393.802
2009.29	2009	4	16	8	392.578	392.318	0.178		392.318	392.318	392.318	392.318	392.318		393.868	1.5504	393.868
2009.29	2009	4	16	9	392.561	392.52	0.186		392.52	392.52	392.52	392.52	392.52		393.944	1.42444	393.944
2009.29	2009	4	16	10	392.471	392.338	0.141		392.338	392.338	392.338	392.338	392.338		394.037	1.69874	394.037
2009.29	2009	4	16	11	393.217	393.167	0.427		393.167	393.167	393.167	393.167	393.167		394.149	0.982484	394.149
2009.29	2009	4	16	12	393.85	393.604	0.525		393.604	393.604	393.604	393.604	393.604		394.256	0.651661	394.256
2009.29	2009	4	16	13	394.869	394.907	0.486		394.907	394.907	394.907	394.907	394.907		394.342	0.564506	394.342
2009.29	2009	4	16	14	393.261	393.032	0.28		393.032	393.032	393.032	393.032	393.032		394.422	1.38994	394.422
2009.29	2009	4	16	15	392.977	392.844	0.136		392.844	392.844	392.844	392.844	392.844		394.495	1.65123	394.495
2009.29	2009	4	16	16	393.208	393.145	0.197		393.145	393.145	393.145	393.145	393.145		394.557	1.41155	394.557
2009.29	2009	4	16	17	393.538	393.392	0.163		393.392	393.392	393.392	393.392	393.392		394.61	1.21845	394.61
2009.29	2009	4	16	18	394.136	394.132	0.686		394.132	394.132	394.132	394.132	394.132		394.66	0.527752	394.66
2009.29	2009	4	16	19	394.549	394.355	0.677		394.355	394.355	394.355	394.355	394.355		394.697	0.342315	394.697
2009.29	2009	4	16	20	393.741	393.919	1.127		0	0	0	393.919	393.919		394.716	0.797234	394.716
2009.29	2009	4	16	21	397.524	397.572	0.611		397.572	397.572	397.572	397.572	397.572		394.728	2.84433	394.728
2009.29	2009	4	16	22	399.052	398.96	0.22		398.96	398.96	398.96	398.96	0		394.738	4.22228	REJECT
2009.29	2009	4	16	23	399.081	398.896	0.047		398.896	398.896	398.896	398.896	398.896		394.748	4.14824	394.748
2009.29	2009	4	17	0	399.145	399.046	0.084		399.046	399.046	399.046	399.046	0		394.759	4.2867	REJECT
2009.29	2009	4	17	1	398.756	398.675	0.143		398.675	398.675	398.675	398.675	398.675		394.775	3.90046	394.775
2009.29	2009	4	17	2	398.499	398.297	0.249		398.297	398.297	398.297	398.297	398.297		394.785	3.51224	394.785
2009.29	2009	4	17	3	398.121	398.073	0.287		398.073	398.073	398.073	398.073	398.073		394.792	3.28132	394.792
2009.29	2009	4	17	4	397.348	397.228	0.175		397.228	397.228	397.228	397.228	397.228		394.799	2.42923	394.799
2009.29	2009	4	17	5	397.662	397.529	0.055		397.529	397.529	397.529	397.529	397.529		394.802	2.72687	394.802
2009.29	2009	4	17	6	397.738	397.593	0.053		397.593	397.593	397.593	397.593	397.593		394.811	2.78249	394.811
2009.29	2009	4	17	7	397.65	397.547	0.095		397.547	397.547	397.547	397.547	397.547		394.819	2.72757	394.819
2009.29	2009	4	17	8	397.483	397.472	0.159		397.472	397.472	397.472	397.472	397.472		394.827	2.64541	394.827
2009.29	2009	4	17	9	397.366	397.291	0.18		397.291	397.291	397.291	397.291	397.291		394.833	2.45757	394.833
2009.29	2009	4	17	10	396.988	396.872	0.336		396.872	396.872	396.872	396.872	396.872		394.845	2.02654	394.845
2009.29	2009	4	17	11	396.736	396.612	0.094		396.612	396.612	396.612	396.612	396.612		394.868	1.74436	394.868
2009.29	2009	4	17	12	396.964	396.775	0.035		396.775	396.775	396.775	396.775	396.775		394.894	1.88078	394.894
2009.29	2009	4	17	13	396.992	396.879	0.042		396.879	396.879	396.879	396.879	396.879		394.922	1.95665	394.922
2009.29	2009	4	17	14	396.78	396.638	0.154		396.638	396.638	396.638	396.638	396.638		394.959	1.67862	394.959
2009.29	2009	4	17	15	396.438	396.208	0.229		396.208	396.208	396.208	396.208	396.208		394.992	1.21576	394.992
2009.29	2009	4	17	16	396.545	396.422	0.215		396.422	396.422	396.422	396.422	396.422		395.008	1.41357	395.008
2009.29	2009	4	17	17	396.712	396.566	0.13		396.566	396.566	396.566	396.566	396.566		395.02	1.54558	395.02
2009.29	2009	4	17	18	396.348	396.195	0.172		396.195	396.195	396.195	396.195	396.195		395.029	1.16608	395.029
2009.29	2009	4	17	19	396.395	396.221	0.105		396.221	396.221	396.221	396.221	396.221		395.038	1.18277	395.038
2009.29	2009	4	17	20	396.248	396.26	0.269		396.26	396.26	396.26	396.26	396.26		395.044	1.21646	395.044
2009.29	2009	4	17	21	397.055	396.939	0.14		396.939	396.939	396.939	396.939	396.939		395.046	1.8932	395.046
2009.29	2009	4	17	22	397.062	396.983	0.114		396.983	396.983	396.983	396.983	396.983		395.051	1.93173	395.051
2009.29	2009	4	17	23	397.437	397.364	0.069		397.364	397.364	397.364	397.364	397.364		395.071	2.29348	395.071
2009.29	2009	4	18	0	397.482	397.293	0.242		397.293	397.293	397.293	397.293	397.293		395.094	2.19908	395.094
2009.29	2009	4	18	1	396.751	396.594	0.26		396.594	396.594	396.594	396.594
2009.29	2009	4	18	2	396.075	395.914	0.202		395.914	395.914	395.914	395.914
2009.29	2009	4	18	3	395.741	395.588	0.152		395.588	395.588	395.588	395.588
2009.29	2009	4	18	4	396.122	396.158	0.665		396.158	396.158	396.158	396.158
2009.29	2009	4	18	5	397.419	397.34	0.368		397.34	397.34	397.34	397.34
2009.29	2009	4	18	6	397.577	397.18	0.736		397.18	397.18	397.18	397.18
2009.29	2009	4	18	7	399.056	398.336	0.508		398.336	0	398.336	398.336
2009.29	2009	4	18	8	398.841	398.843	0.365		398.843	398.843	398.843	398.843
2009.3	2009	4	18	9	399.905	399.811	0.489		399.811	399.811	399.811	399.811
2009.3	2009	4	18	10	401.591	401.496	1.159		0	0	0	401.496
2009.3	2009	4	18	11	401.33	401.022	1.021		0	0	0	401.022
2009.3	2009	4	18	12	399.327	399.229	0.85		399.229	399.229	399.229	399.229
2009.3	2009	4	18	13	399.651	399.367	0.406		399.367	399.367	399.367	399.367
2009.3	2009	4	18	14	398.054	397.814	0.893		397.814	397.814	397.814	397.814
2009.3	2009	4	18	15	396.682	396.428	0.097		396.428	396.428	396.428	396.428
2009.3	2009	4	18	16	395.891	395.706	0.313		395.706	395.706	395.706	395.706
2009.3	2009	4	18	17	395.229	395.075	0.46		395.075	395.075	395.075	395.075
2009.3	2009	4	18	18	394.411	394.127	0.673		394.127	394.127	394.127	394.127
2009.3	2009	4	18	19	393.022	392.723	0.205		392.723	392.723	392.723	392.723
2009.3	2009	4	18	20	392.395	392.373	0.246		392.373	392.373	392.373	392.373
2009.3	2009	4	18	21	392.707	392.542	0.085		392.542	392.542	392.542	392.542
2009.3	2009	4	18	22	392.62	392.518	0.123		392.518	392.518	392.518	392.518
2009.3	2009	4	18	23	392.89	392.766	0.17		392.766	392.766	392.766	392.766
2009.3	2009	4	19	0	393.057	392.835	0.151		392.835	392.835	392.835	392.835
2009.3	2009	4	19	1	392.545	392.439	0.25		392.439	392.439	392.439	392.439
2009.3	2009	4	19	2	392.221	392.112	0.158		392.112	392.112	392.112	392.112
2009.3	2009	4	19	3	392.34	392.303	0.183		392.303	392.303	392.303	392.303
2009.3	2009	4	19	4	392.399	392.221	0.062		392.221	392.221	392.221	392.221
2009.3	2009	4	19	5	392.395	392.273	0.125		392.273	392.273	392.273	392.273
2009.3	2009	4	19	6	392.459	392.322	0.084		392.322	392.322	392.322	392.322
2009.3	2009	4	19	7	392.314	392.183	0.131		392.183	392.183	392.183	392.183
2009.3	2009	4	19	8	392.426	392.145	0.141		392.145	392.145	392.145	392.145
2009.3	2009	4	19	9	392.833	392.726	0.207		392.726	392.726	392.726	392.726
2009.3	2009	4	19	10	393.402	393.383	0.464		393.383	393.383	393.383	393.383
2009.3	2009	4	19	11	393.976	393.765	0.216		393.765	393.765	393.765	393.765
2009.3	2009	4	19	12	394.165	394.063	0.381		394.063	394.063	394.063	394.063
2009.3	2009	4	19	13	395.042	394.896	0.241		394.896	394.896	394.896	394.896
2009.3	2009	4	19	14	394.484	394.365	0.517		394.365	394.365	394.365	394.365
2009.3	2009	4	19	15	392.846	392.702	0.563		392.702	392.702	392.702	392.702
2009.3	2009	4	19	16	392.584	392.395	0.11		392.395	392.395	392.395	392.395
2009.3	2009	4	19	17	392.418	392.309	0.164		392.309	392.309	392.309	392.309
2009.3	2009	4	19	18	392.435	392.351	0.154		392.351	392.351	392.351	392.351
2009.3	2009	4	19	19	392.369	392.294	0.147		392.294	392.294	392.294	392.294
2009.3	2009	4	19	20	392.319	392.248	0.188		392.248	392.248	392.248	392.248
2009.3	2009	4	19	21	392.621	392.496	0.232		392.496	392.496	392.496	392.496
2009.3	2009	4	19	22	394.886	394.821	1.254		0	0	0	394.821
2009.3	2009	4	19	23	395.397	395.07	0.712		395.07	395.07	395.07	395.07

## Sheet: Uncertainty sensitivity tests
This tab gives the results from our uncertainty sensitivity tests that were discussed in the Discussion section of the main paper. The essential objective was to identify how sensitive the SVLR subset sizes would be to random error resulting in underestimation of station CO2 lapse rates. These tests used a uniform random number generator and can be taken as one indication of the sensitivity of SV…
% error (the proportion by which we inflated the lapse rate)
	SVLR subset size reduction (%)
0.2	1.344
0.4	1.8546
0.8	2.9138
2	6.2406
4	11.9786
10	25.282
